# Supplementary material
Source: ML conference proceedings conference paper supplement (https://aclanthology.org/2020.acl-main.1)

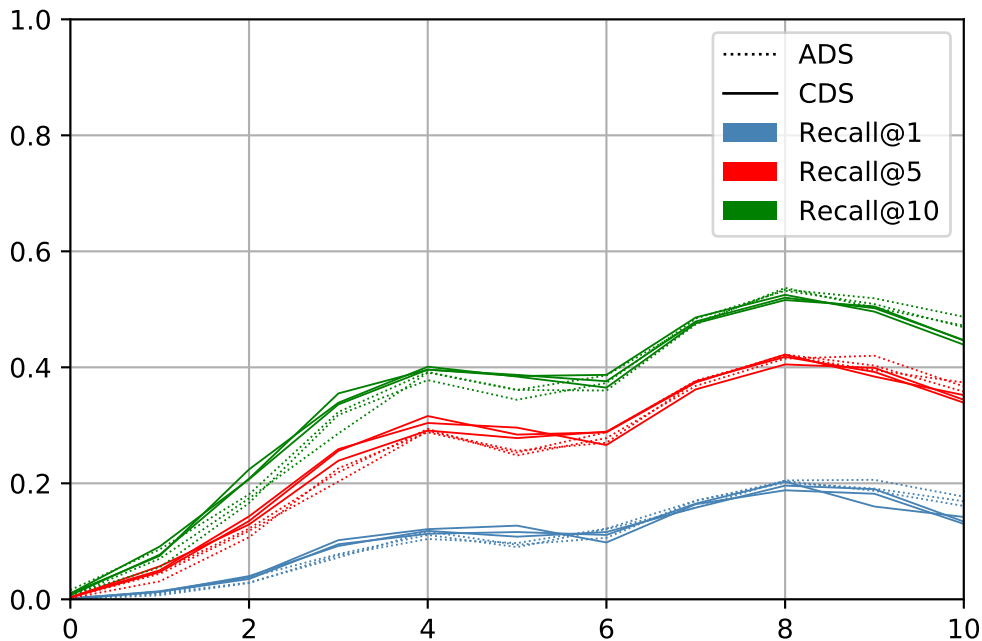

Supplement: Software [file val_10_natural.pdf › val_10_natural.pdf]

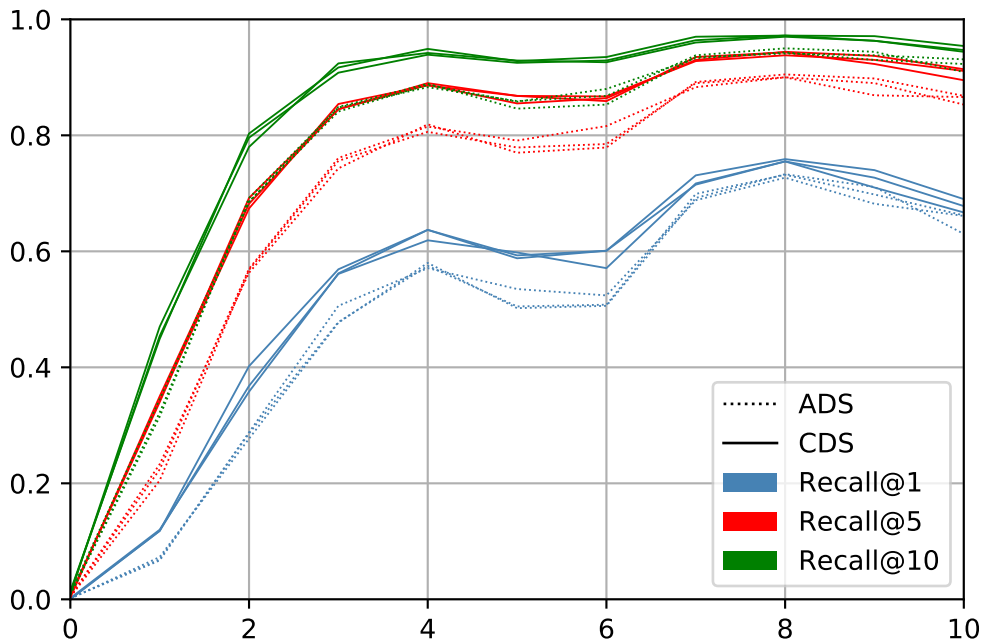

Supplement: Software [file val_10_synth.pdf › val_10_synth.pdf]
